# Supplementary material
Source: Springer Nature journal article supplement (https://www.springermedizin.de/resource/supplementary/12885_2014_4682_MOESM4_ESM.pdf/9467032)

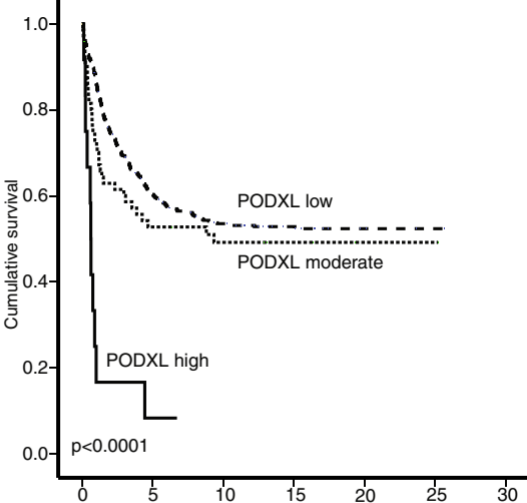

**Patients at risk**

|          |     |     |     |     |    |   |
|----------|-----|-----|-----|-----|----|---|
| Low      | 714 | 367 | 267 | 112 | 35 | 3 |
| Moderate | 79  | 36  | 26  | 13  | 5  | 1 |
| High     | 14  | 1   | 0   | 0   | 0  | 0 |

Supplement: MOESM4 [file 9467032]
